# Supplementary material for: On-demand lactate monitoring towards assessing physiological responses in sedentary populations
Source: Royal Society of Chemistry journal article supplement (doi:10.1039/d1an00455g), 2021-01-01
Supplement: d1an00455g1.pdf [file d1an00455g1.pdf]

**On-demand lactate monitoring towards assessing physiological responses in sedentary populations**

Ashlesha Bhide<sup>a</sup>, Kai-Chun Lin<sup>a</sup>, Sriram Muthukumar<sup>b</sup>, Shalini Prasad<sup>a</sup>

<sup>a</sup>Department of Bioengineering, University of Texas at Dallas, 800 West Campbell Road, Richardson, TX, 75080,  
USA

<sup>b</sup>Enlisen LLC, 1813 Audubon Pond Way, Allen, TX, 75013, USA

Supplementary information

| Biosensor                                                                                           | Substrate      | Electrochemical detection technique    | Redox mediator | Limit of detection | Reference |
|-----------------------------------------------------------------------------------------------------|----------------|----------------------------------------|----------------|--------------------|-----------|
| Patch sensor with enzyme/Prussian blue polyester thread coated with conductive inks                 | Thread         | Chronoamperometry                      | ✓              | 3.6mM              | [16]      |
| MWCNT modified electrode immobilized with osmium- HRP complex and a bioactive bienzyme gel membrane | Polypropylene  | Chronoamperometry                      | ✓              | 3mM                | [18]      |
| Janus textile embedded with gold electrodes                                                         | Polyurethane   | Differential pulse voltammetry         | No             | 10mM               | [21]      |
| MIP imprinted lactate-based Ag nanowire coated carbon electrode                                     | Polyurethane   | Differential pulse voltammetry         | ✓              | 1.5mM              | [19]      |
| Textile biosensor with stretchable gold elastomer fiber electrode                                   | Textile        | Chronoamperometry                      | ✓              | 0.137mM            | [17]      |
| CNT based enzyme - TTF mediator modified gold electrode                                             | Flex substrate | Chronoamperometry                      | ✓              | 1mM                | [20]      |
| Hybrid ZnO/gold electrode immobilized with enzyme                                                   | Polyamide      | Electrochemical impedance spectroscopy | No             | 1mM                | This work |

Table S1. The biosensing performances various wearable electrochemical on-body sweat lactate biosensors reported in literature and their sensing techniques.

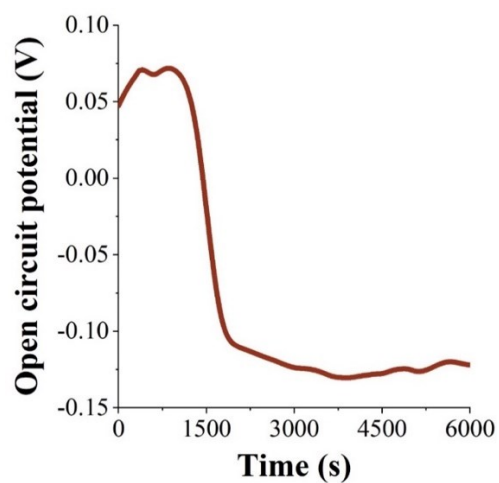

Figure S1a. Open circuit potential of the unfunctionalized Au/ZnO electrodes in PBS

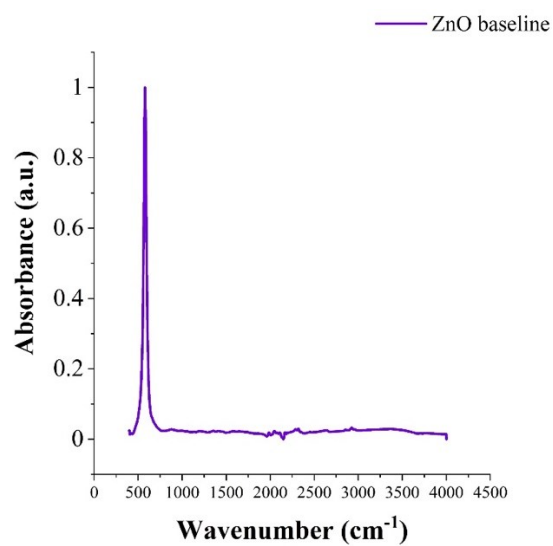

Figure S1b. FTIR peak of the nanotextured ZnO film

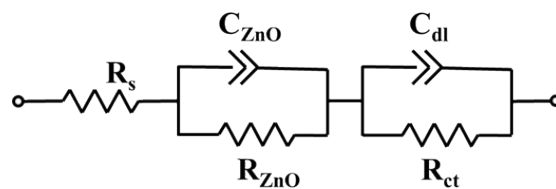

Figure S2. Randle's equivalent circuit modelled for the electrode- sweat interface

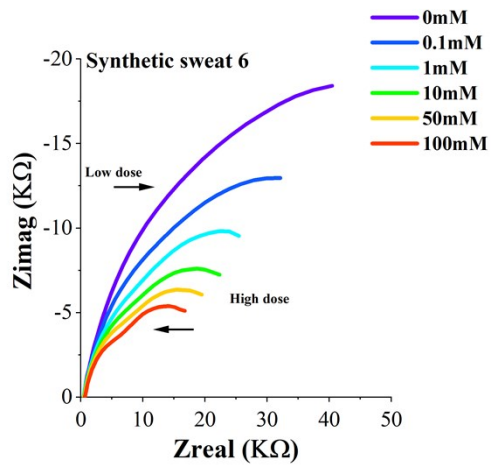

Figure S3a. Nyquist plot for lactate oxidase- lactate interaction for varying lactate dose concentrations in synthetic sweat pH 6

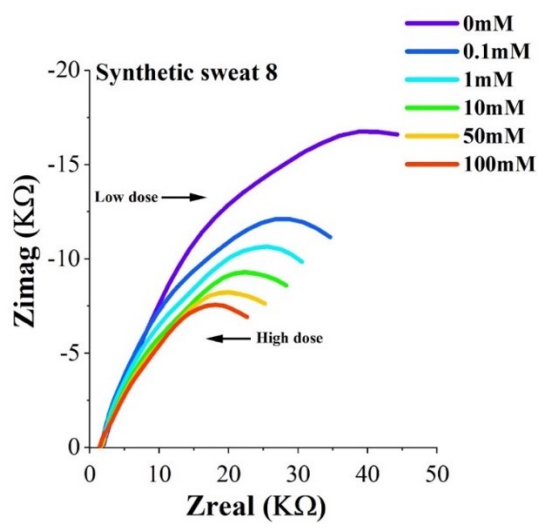

Figure S3b. Nyquist plot for lactate oxidase- lactate interaction for varying lactate dose concentrations in synthetic sweat pH 8

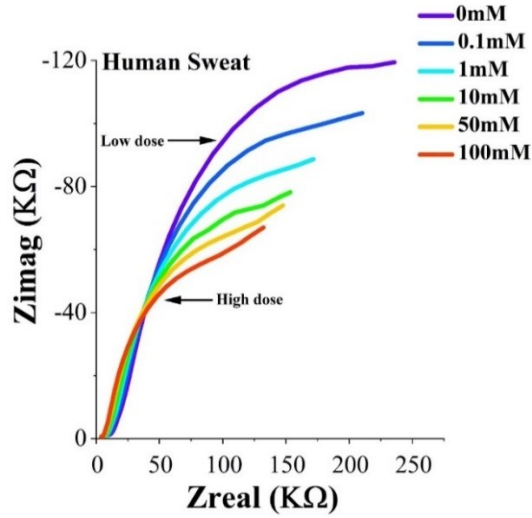

Figure S3c. Nyquist plot for lactate oxidase- lactate interaction for varying lactate dose concentrations in human sweat

| Dose | Rct   | Cdl      | Rzno     | Czno     |
|------|-------|----------|----------|----------|
| 0    | 40094 | 2.08E-06 | 2.08E-06 | 2.62E-06 |
| 0.1  | 27836 | 2.73E-06 | 2.73E-06 | 2.07E-06 |
| 1    | 20786 | 2.88E-06 | 2.88E-06 | 2.14E-06 |
| 10   | 16961 | 3.05E-06 | 3.05E-06 | 1.75E-06 |
| 50   | 14036 | 3.64E-06 | 3.64E-06 | 1.64E-06 |
| 100  | 11811 | 5.27E-06 | 5.27E-06 | 1.54E-06 |

Table ST1. Extracted circuit parameters modulated by the lactate oxidase- lactate interaction for varying lactate dose concentrations in synthetic sweat pH 6

| Dose | Rct   | Cdl      | Rzno     | Czno     |
|------|-------|----------|----------|----------|
| 0    | 38045 | 2.30E-06 | 18647    | 4.90E-06 |
| 0.1  | 22379 | 2.70E-06 | 1.05E+04 | 9.00E-06 |
| 1    | 24706 | 3.80E-06 | 13150    | 3.01E-06 |
| 10   | 19525 | 4.90E-06 | 6474     | 2.65E-06 |
| 50   | 17411 | 6.10E-06 | 3763     | 1.16E-05 |
| 100  | 15609 | 7.20E-06 | 1914     | 9.14E-06 |

Table ST2. Extracted circuit parameters modulated by the lactate oxidase- lactate interaction for varying lactate dose concentrations in synthetic sweat pH 8

| Dose | Rct   | Cdl      | Rzno     | Czno     |
|------|-------|----------|----------|----------|
| 0    | 38045 | 2.30E-06 | 18647    | 4.90E-06 |
| 0.1  | 22379 | 2.70E-06 | 1.05E+04 | 9.00E-06 |

|     |       |          |       |          |
|-----|-------|----------|-------|----------|
| 1   | 24706 | 3.80E-06 | 16119 | 3.01E-06 |
| 10  | 19525 | 4.90E-06 | 4740  | 2.65E-06 |
| 50  | 17411 | 6.10E-06 | 3222  | 1.16E-05 |
| 100 | 15609 | 7.20E-06 | 2544  | 9.14E-06 |

Table ST3. Extracted circuit parameters modulated by the lactate oxidase- lactate interaction for varying lactate dose concentrations in human sweat

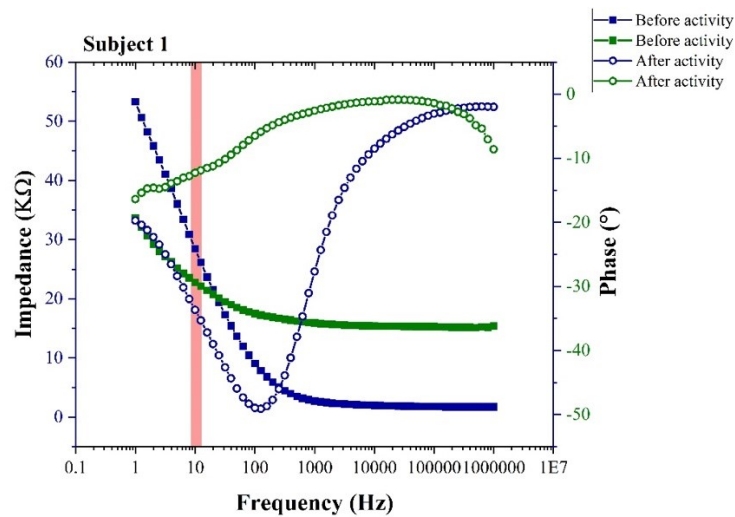

Figure S4a. Bode magnitude and phase plots extracted for subject 1 before and after activity

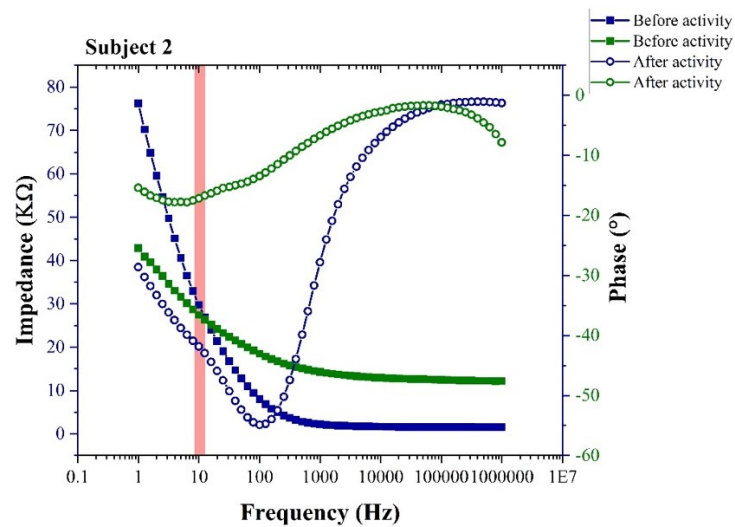

Figure S4b. Bode magnitude and phase plots extracted for subject 2 before and after activity

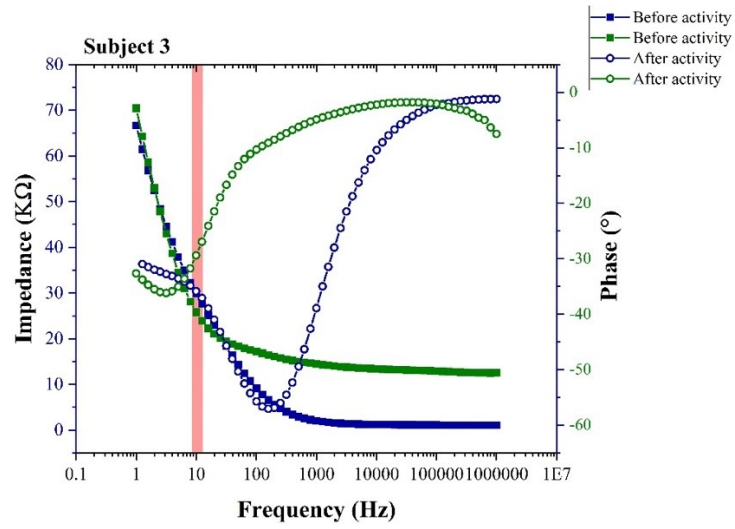

Figure S4c. Bode magnitude and phase plots extracted for subject 3 before and after activity
